# Supplementary material
Source: Springer Nature journal article supplement (https://www.springermedizin.de/resource/supplementary/12885_2012_3739_MOESM5_ESM.docx/9465980)
Supplement: MOESM5 [file 9465980]

**Figure 3. Expanded Theory of Planned Behavior**

CBE= Clinical Breast Exam
